# Supplementary material for: Examining genotype-phenotype associations of GRAM domain proteins using GWAS, PheWAS and literature review in cattle, human, pig, mouse and chicken
Source: PubMed Central journal article supplement — Sci Rep. 2024 Nov 21;14:28889. doi: 10.1038/s41598-024-80117-7 (PMC11582632; doi:10.1038/s41598-024-80117-7), 2024-11-21

## Supplementary materials

### Unveiling genotype-phenotype associations of GRAM domain proteins using GWAS, PheWAS and literature review in cattle, human, pig, mouse and chicken

Tanja Kunej<sup>1\*</sup>, Martin Šimon<sup>1</sup>, Barbara Luštrek<sup>1</sup>, Simon Horvat<sup>1</sup>, Klemen Potočnik<sup>1\*</sup>

<sup>1</sup>University of Ljubljana, Biotechnical Faculty, Department of Animal Science, Groblje 3, SI-1230 Domžale, Slovenia

**Supplementary Table S1.** Gene symbols and chromosome locations for *GRAMD* genes in five vertebrate species.

| Cattle         |            | Pig            |            | Human                              |            | Mouse                             |            | Chicken                         |            |
|----------------|------------|----------------|------------|------------------------------------|------------|-----------------------------------|------------|---------------------------------|------------|
| Gene symbol    | Chromosome | pig            | Chromosome | Gene symbol, alias name            | Chromosome | Gene symbol, alias name           | Chromosome | Gene symbol, alias name         | Chromosome |
| <i>GRAMD1A</i> | 18         | <i>GRAMD1A</i> | 6          | <i>GRAMD1A</i> ,<br><i>Aster-A</i> | 19         | <i>Gramd1a</i>                    | 7          | No ortholog                     | /          |
| <i>GRAMD1B</i> | 15         | <i>GRAMD1B</i> | 9          | <i>GRAMD1B</i> ,<br><i>Aster-B</i> | 11         | <i>Gramd1b</i>                    | 9          | <i>GRAMD1B</i>                  | 24         |
| <i>GRAMD1C</i> | 1          | <i>GRAMD1C</i> | 13         | <i>GRAMD1C</i> ,<br><i>Aster-C</i> | 3          | <i>Gramd1c</i>                    | X          | <i>GRAMD1C</i>                  | 1          |
| <i>GRAMD2A</i> | 10         | <i>GRAMD2A</i> | 7          | <i>GRAMD2A</i>                     | 15         | <i>Gramd2a</i> ,<br><i>Gramd2</i> | 9          | <i>GRAMD2</i><br><i>GRAMD2A</i> | 10         |
| <i>GRAMD2B</i> | 7          | <i>GRAMD2B</i> | 2          | <i>GRAMD2B</i>                     | 5          | <i>Gramd2b</i> ,<br><i>Gramd3</i> | 18         | <i>GRAMD2B</i>                  | Z          |
| <i>GRAMD4</i>  | 5          | <i>GRAMD4</i>  | 5          | <i>GRAMD4</i>                      | 22         | <i>Gramd4</i>                     | 15         | <i>GRAMD4</i>                   | 1          |

**Supplementary Table S2.** Results of the association analysis between *GRAMD1B* SNP rs41761360 and 36 traits in cattle.

| Trait                   | SNP Effect | Base Freq | SNP W    | Rang  | Prang    | Sum Up   | Sum Down |
|-------------------------|------------|-----------|----------|-------|----------|----------|----------|
| Teat thickness          | -0,0049    | 0,2945    | 0,004903 | 742   | 1,71276  | 8,10726  | 91,88446 |
| Rump angle              | -0,00516   | 0,2945    | 0,005163 | 1083  | 2,49988  | 9,82959  | 90,16303 |
| Overall rump            | -0,00416   | 0,2945    | 0,004156 | 1211  | 2,79535  | 10,86415 | 89,12859 |
| Rump length             | -0,00401   | 0,2945    | 0,00401  | 1901  | 4,38807  | 15,87324 | 84,12025 |
| Heel height             | -0,0039    | 0,2945    | 0,003898 | 2959  | 6,83025  | 22,02394 | 77,97037 |
| Rump height             | -0,00357   | 0,2945    | 0,003574 | 3042  | 7,02184  | 23,25505 | 76,73931 |
| Rear udder height       | -0,00312   | 0,2945    | 0,003118 | 3707  | 8,55685  | 25,87893 | 74,11578 |
| Udder depth             | -0,00374   | 0,2945    | 0,003745 | 3736  | 8,62379  | 26,35659 | 73,63816 |
| Longevity               | -0,00278   | 0,2945    | 0,002783 | 5201  | 12,00545 | 33,59404 | 66,4013  |
| Top line                | -0,00273   | 0,2945    | 0,002725 | 5458  | 12,59868 | 34,48244 | 65,513   |
| Thurl placement         | -0,0024    | 0,2945    | 0,002404 | 6568  | 15,16089 | 39,60594 | 60,38981 |
| Overall feet/legs score | -0,00245   | 0,2945    | 0,002445 | 7721  | 17,82235 | 44,04748 | 55,94859 |
| Calving interval        | -0,00207   | 0,2945    | 0,002072 | 9503  | 21,93574 | 51,44127 | 48,55523 |
| Foot angle              | -0,00237   | 0,2945    | 0,002373 | 9707  | 22,40663 | 51,84077 | 48,15576 |
| Milking speed           | -0,0022    | 0,2945    | 0,002201 | 10260 | 23,68312 | 53,85248 | 46,14416 |
| Rear-leg set            | 0,002052   | 0,2945    | 0,002052 | 11542 | 26,64235 | 57,51725 | 42,47961 |
| Overall frame           | -0,00161   | 0,2945    | 0,001613 | 13885 | 32,05069 | 65,10607 | 34,89121 |
| Overall udder score     | -0,00142   | 0,2945    | 0,001415 | 17135 | 39,55265 | 72,68504 | 27,31266 |
| Rear teat placement     | -0,00132   | 0,2945    | 0,001322 | 17478 | 40,3444  | 73,77226 | 26,22551 |
| Sum (points)            | -0,00124   | 0,2945    | 0,001237 | 17644 | 40,72757 | 74,07811 | 25,91967 |
| Fore udder attachment   | -0,00098   | 0,2945    | 0,000975 | 21635 | 49,93998 | 82,08768 | 17,91056 |
| Front teat length       | 0,001132   | 0,2945    | 0,001132 | 23335 | 53,86409 | 85,03186 | 14,96655 |
| Scs (log2n)             | 0,001051   | 0,2945    | 0,001051 | 24588 | 56,75638 | 86,54824 | 13,45026 |
| Body depth              | 0,000923   | 0,2945    | 0,000923 | 25214 | 58,20138 | 87,79663 | 12,20197 |
| Protein yield td        | -0,00084   | 0,2945    | 0,000835 | 26432 | 61,01288 | 89,27908 | 10,7196  |
| Front teat placement    | -0,0008    | 0,2945    | 0,000801 | 26992 | 62,30553 | 90,02168 | 9,97706  |
| Milk yield td           | -0,00042   | 0,2945    | 0,000419 | 34312 | 79,20225 | 97,09217 | 2,90717  |
| Rump width              | -0,00035   | 0,2945    | 0,000353 | 35100 | 81,02119 | 97,5564  | 2,44301  |
| Chest width             | -0,00037   | 0,2945    | 0,000367 | 35419 | 81,75754 | 97,71592 | 2,28349  |
| Hock quality            | 0,000333   | 0,2945    | 0,000333 | 35605 | 82,18688 | 97,83188 | 2,16755  |
| Udder balance           | -0,00017   | 0,2945    | 0,000169 | 39084 | 90,21744 | 99,36358 | 0,63611  |
| Rear teat direction     | -0,00013   | 0,2945    | 0,000129 | 40640 | 93,80915 | 99,73612 | 0,26368  |
| Udder cleft depth       | -9,7E-05   | 0,2945    | 9,71E-05 | 41332 | 95,40649 | 99,85238 | 0,14748  |
| Fat yield td            | 4,36E-05   | 0,2945    | 4,36E-05 | 42375 | 97,81404 | 99,96647 | 0,03346  |
| Fore udder length       | -1,8E-05   | 0,2945    | 1,82E-05 | 42918 | 99,06745 | 99,99418 | 0,0058   |
| Rear udder width        | -1,3E-05   | 0,2945    | 1,35E-05 | 43012 | 99,28443 | 99,99678 | 0,0032   |

**Supplementary Table S3.** Results of the association analysis between *GRAMD1B* SNP rs109709275 and 36 traits in cattle.

| Trait                   | SNP Effect | Base Freq | SNP W    | Rang  | Prang    | Sum Up   | Sum Down |
|-------------------------|------------|-----------|----------|-------|----------|----------|----------|
| Fat yield td            | -0,00369   | 0,7502    | 0,003694 | 2617  | 6,04081  | 20,21531 | 79,77879 |
| Calving interval        | 0,003241   | 0,7502    | 0,003241 | 3430  | 7,91746  | 25,12208 | 74,87245 |
| Rump height             | 0,003402   | 0,7502    | 0,003402 | 3515  | 8,11366  | 25,86083 | 74,1338  |
| Rump angle              | 0,003581   | 0,7502    | 0,003581 | 4028  | 9,29782  | 27,62449 | 72,37039 |
| Milk yield td           | -0,00327   | 0,7502    | 0,003273 | 4104  | 9,47325  | 28,24709 | 71,74782 |
| Overall udder score     | -0,0029    | 0,7502    | 0,002905 | 5036  | 11,62458 | 32,79526 | 67,20002 |
| Front teat length       | 0,003357   | 0,7502    | 0,003357 | 5047  | 11,64997 | 33,40014 | 66,59515 |
| Fore udder attachment   | -0,00233   | 0,7502    | 0,002325 | 6808  | 15,71488 | 40,98461 | 59,01119 |
| Fore udder length       | -0,00268   | 0,7502    | 0,002676 | 6938  | 16,01496 | 41,25329 | 58,74258 |
| Top line                | 0,002233   | 0,7502    | 0,002233 | 8403  | 19,39661 | 46,64559 | 53,35067 |
| Overall rump            | 0,001994   | 0,7502    | 0,001994 | 9703  | 22,3974  | 51,74095 | 48,25557 |
| Rear udder width        | -0,00218   | 0,7502    | 0,002184 | 10419 | 24,05014 | 53,97597 | 46,02069 |
| Protein yield td        | -0,00208   | 0,7502    | 0,002081 | 10780 | 24,88343 | 55,28863 | 44,70809 |
| Milking speed           | -0,00213   | 0,7502    | 0,002127 | 10854 | 25,05424 | 55,80904 | 44,18772 |
| Hock quality            | 0,001782   | 0,7502    | 0,001782 | 11983 | 27,66031 | 58,88893 | 41,10803 |
| Longevity               | -0,00176   | 0,7502    | 0,001764 | 12529 | 28,92064 | 60,73292 | 39,26412 |
| Rump width              | -0,00171   | 0,7502    | 0,001706 | 12806 | 29,56004 | 61,65832 | 38,33879 |
| Thurl placement         | 0,001561   | 0,7502    | 0,001561 | 13824 | 31,90988 | 64,43125 | 35,56599 |
| Scs (log2n)             | -0,00171   | 0,7502    | 0,001709 | 15949 | 36,81501 | 69,75879 | 30,23877 |
| Rump length             | 0,001326   | 0,7502    | 0,001326 | 18264 | 42,15872 | 75,23024 | 24,76761 |
| Teat thickness          | 0,001239   | 0,7502    | 0,001239 | 18554 | 42,82812 | 76,23165 | 23,76626 |
| Heel height             | 0,001378   | 0,7502    | 0,001378 | 19671 | 45,40649 | 78,19852 | 21,79947 |
| Front teat placement    | -0,00111   | 0,7502    | 0,001108 | 21816 | 50,35779 | 82,25086 | 17,7474  |
| Rear teat direction     | -0,00103   | 0,7502    | 0,00103  | 23646 | 54,58197 | 85,22757 | 14,77085 |
| Overall feet/legs score | -0,00087   | 0,7502    | 0,000872 | 25604 | 59,10161 | 88,05863 | 11,93997 |
| Rear teat placement     | -0,0008    | 0,7502    | 0,000799 | 25931 | 59,85642 | 88,69103 | 11,30762 |
| Rear udder height       | -0,00068   | 0,7502    | 0,000675 | 28601 | 66,01957 | 91,87504 | 8,12381  |
| Udder balance           | -0,00051   | 0,7502    | 0,00051  | 30888 | 71,29865 | 94,40238 | 5,5967   |
| Foot angle              | 0,000604   | 0,7502    | 0,000604 | 31409 | 72,50127 | 94,83624 | 5,16288  |
| Udder depth             | -0,0006    | 0,7502    | 0,000598 | 32094 | 74,08245 | 95,3957  | 4,60346  |
| Overall frame           | 0,000478   | 0,7502    | 0,000478 | 32354 | 74,68261 | 95,68689 | 4,3123   |
| Rear-leg set            | -0,00051   | 0,7502    | 0,000508 | 32936 | 76,02604 | 96,02775 | 3,97148  |
| Udder cleft depth       | -0,00031   | 0,7502    | 0,00031  | 36766 | 84,86681 | 98,45448 | 1,54505  |
| Sum (points)            | -9E-05     | 0,7502    | 9,03E-05 | 41071 | 94,80403 | 99,81904 | 0,1808   |
| Body depth              | 6,08E-05   | 0,7502    | 6,08E-05 | 42046 | 97,05461 | 99,94091 | 0,05899  |
| Chest width             | 5,17E-05   | 0,7502    | 5,17E-05 | 42173 | 97,34777 | 99,95302 | 0,0469   |

**Supplementary Table S4.** Results of the association analysis between *GRAMD1B* SNP rs41763278 and 36 traits in cattle.

| Trait                   | SNP Effect | Base Freq | SNP W    | Rang  | Prang    | Sum Up   | Sum Down |
|-------------------------|------------|-----------|----------|-------|----------|----------|----------|
| Front teat length       | 0,007855   | 0,3886    | 0,007855 | 192   | 0,44319  | 2,44891  | 97,54007 |
| Rump angle              | -0,00467   | 0,3886    | 0,004672 | 1667  | 3,84793  | 13,92687 | 86,06645 |
| Fore udder length       | -0,00404   | 0,3886    | 0,004045 | 2190  | 5,05517  | 17,47833 | 82,51543 |
| Udder cleft depth       | -0,00354   | 0,3886    | 0,003538 | 3522  | 8,12982  | 25,31198 | 74,68266 |
| Calving interval        | 0,002588   | 0,3886    | 0,002588 | 6110  | 14,10369 | 38,18258 | 61,81305 |
| Udder balance           | -0,00209   | 0,3886    | 0,002088 | 8506  | 19,63437 | 47,51701 | 52,47923 |
| Overall rump            | -0,00209   | 0,3886    | 0,002091 | 8912  | 20,57153 | 48,92107 | 51,07527 |
| Teat thickness          | 0,002062   | 0,3886    | 0,002062 | 9499  | 21,9265  | 51,55637 | 48,44015 |
| Longevity               | -0,00176   | 0,3886    | 0,001765 | 12524 | 28,9091  | 60,71813 | 39,27891 |
| Rear-leg set            | 0,001877   | 0,3886    | 0,001877 | 13141 | 30,33332 | 62,31431 | 37,68282 |
| Thurl placement         | -0,00153   | 0,3886    | 0,001532 | 14155 | 32,67393 | 65,33541 | 34,66188 |
| Hock quality            | 0,001426   | 0,3886    | 0,001426 | 16198 | 37,38978 | 70,36038 | 29,63719 |
| Rump width              | -0,00127   | 0,3886    | 0,001272 | 18261 | 42,15179 | 75,28681 | 24,71104 |
| Milking speed           | -0,00127   | 0,3886    | 0,001274 | 20081 | 46,35289 | 79,13516 | 20,8629  |
| Sum (points)            | 0,000905   | 0,3886    | 0,000905 | 23082 | 53,28009 | 84,4924  | 15,50597 |
| Fat yield td            | -0,00092   | 0,3886    | 0,00092  | 24740 | 57,10724 | 86,94225 | 13,05628 |
| Top line                | -0,00081   | 0,3886    | 0,000814 | 26008 | 60,03416 | 88,58572 | 11,41291 |
| Front teat placement    | -0,00081   | 0,3886    | 0,000815 | 26735 | 61,71229 | 89,69413 | 10,30459 |
| Body depth              | 0,000771   | 0,3886    | 0,000771 | 27798 | 64,16601 | 91,13021 | 8,86862  |
| Rear udder height       | -0,00069   | 0,3886    | 0,000687 | 28369 | 65,48405 | 91,60722 | 8,39162  |
| Rear teat direction     | -0,00074   | 0,3886    | 0,000745 | 28376 | 65,50021 | 91,65208 | 8,34677  |
| Fore udder attachment   | -0,00063   | 0,3886    | 0,000626 | 28437 | 65,64101 | 91,81882 | 8,18005  |
| Chest width             | 0,000657   | 0,3886    | 0,000657 | 29676 | 68,50099 | 93,06243 | 6,93653  |
| Foot angle              | 0,000705   | 0,3886    | 0,000705 | 29690 | 68,53331 | 93,19225 | 6,80672  |
| Overall udder score     | -0,00059   | 0,3886    | 0,000593 | 30621 | 70,68233 | 93,98686 | 6,01217  |
| Overall feet/legs score | 0,000519   | 0,3886    | 0,000519 | 32291 | 74,53719 | 95,48365 | 4,51551  |
| Scs (log2n)             | 0,000514   | 0,3886    | 0,000514 | 33526 | 77,38793 | 96,42768 | 3,57158  |
| Milk yield td           | -0,00031   | 0,3886    | 0,000314 | 36501 | 84,25511 | 98,34068 | 1,65883  |
| Protein yield td        | 0,000273   | 0,3886    | 0,000273 | 37447 | 86,43876 | 98,74971 | 1,24986  |
| Rear udder width        | -0,00028   | 0,3886    | 0,000276 | 37521 | 86,60957 | 98,79139 | 1,20819  |
| Rump length             | -0,00026   | 0,3886    | 0,000258 | 37612 | 86,81963 | 98,81386 | 1,18572  |
| Rump height             | 0,00026    | 0,3886    | 0,00026  | 37704 | 87,03199 | 98,85671 | 1,14287  |
| Udder depth             | -0,00019   | 0,3886    | 0,000185 | 39662 | 91,55164 | 99,52878 | 0,47096  |
| Overall frame           | -7,1E-05   | 0,3886    | 7,05E-05 | 41574 | 95,9651  | 99,89483 | 0,10506  |
| Heel height             | -3,8E-05   | 0,3886    | 3,76E-05 | 42563 | 98,248   | 99,97806 | 0,02189  |
| Rear teat placement     | 2,08E-05   | 0,3886    | 2,08E-05 | 42883 | 98,98666 | 99,99198 | 0,00798  |

**Supplementary Table S5.** Results of the association analysis between *GRAMD1B* SNP rs41756499 and 36 traits in cattle.

| Trait                   | SNP Effect | Base Freq | SNP W    | Rang  | Prang    | Sum Up   | Sum Down |
|-------------------------|------------|-----------|----------|-------|----------|----------|----------|
| Rump length             | -0,00505   | 0,2524    | 0,005048 | 749   | 1,72891  | 7,55279  | 92,43902 |
| Chest width             | -0,00335   | 0,2524    | 0,003348 | 3611  | 8,33526  | 25,46208 | 74,53259 |
| Overall frame           | -0,00289   | 0,2524    | 0,002893 | 4639  | 10,70819 | 31,61881 | 68,37632 |
| Rump height             | -0,00269   | 0,2524    | 0,002686 | 6389  | 14,7477  | 39,53287 | 60,46289 |
| Front teat length       | -0,00288   | 0,2524    | 0,002879 | 7221  | 16,66821 | 42,8829  | 57,11306 |
| Body depth              | -0,00255   | 0,2524    | 0,002547 | 7872  | 18,17091 | 45,31182 | 54,6843  |
| Protein yield td        | -0,00239   | 0,2524    | 0,00239  | 8396  | 19,38045 | 46,91373 | 53,0825  |
| Foot angle              | -0,00253   | 0,2524    | 0,002533 | 8615  | 19,88597 | 47,93148 | 52,06481 |
| Fat yield td            | -0,0023    | 0,2524    | 0,002297 | 8731  | 20,15373 | 48,29675 | 51,69958 |
| Teat thickness          | -0,00214   | 0,2524    | 0,002135 | 8933  | 20,62001 | 49,55157 | 50,44482 |
| Scs (log2n)             | 0,002526   | 0,2524    | 0,002526 | 8940  | 20,63617 | 48,9073  | 51,0891  |
| Fore udder length       | -0,00231   | 0,2524    | 0,002306 | 9293  | 21,45099 | 50,29307 | 49,70337 |
| Udder depth             | -0,00234   | 0,2524    | 0,002341 | 10723 | 24,75186 | 55,12187 | 44,87485 |
| Heel height             | -0,00211   | 0,2524    | 0,002107 | 11844 | 27,33946 | 58,54204 | 41,45489 |
| Milk yield td           | -0,00195   | 0,2524    | 0,001953 | 12137 | 28,01579 | 59,70466 | 40,2923  |
| Longevity               | 0,001725   | 0,2524    | 0,001725 | 12943 | 29,87628 | 61,94373 | 38,05338 |
| Sum (points)            | -0,00123   | 0,2524    | 0,001231 | 17735 | 40,93763 | 74,27983 | 25,71795 |
| Overall rump            | -0,00123   | 0,2524    | 0,001234 | 18222 | 42,06177 | 75,34868 | 24,64916 |
| Overall udder score     | -0,00129   | 0,2524    | 0,001288 | 18791 | 43,37519 | 76,31112 | 23,68679 |
| Rear udder width        | 0,001369   | 0,2524    | 0,001369 | 18945 | 43,73067 | 76,67186 | 23,32605 |
| Overall feet/legs score | -0,00093   | 0,2524    | 0,000932 | 24568 | 56,71022 | 86,55517 | 13,44333 |
| Fore udder attachment   | -0,00079   | 0,2524    | 0,000791 | 24999 | 57,70509 | 87,43791 | 12,56067 |
| Top line                | 0,000754   | 0,2524    | 0,000754 | 27084 | 62,51789 | 89,9984  | 10,00034 |
| Rear teat placement     | -0,00068   | 0,2524    | 0,000685 | 28159 | 64,99931 | 91,47823 | 8,52061  |
| Thurl placement         | -0,00051   | 0,2524    | 0,000507 | 31304 | 72,2589  | 94,7159  | 5,2832   |
| Rear teat direction     | 0,000398   | 0,2524    | 0,000398 | 35011 | 80,81575 | 97,45993 | 2,53946  |
| Rump width              | -0,00031   | 0,2524    | 0,000313 | 36007 | 83,11481 | 98,06763 | 1,93184  |
| Milking speed           | -0,00028   | 0,2524    | 0,000284 | 37334 | 86,17792 | 98,71248 | 1,28709  |
| Rump angle              | -0,00029   | 0,2524    | 0,000291 | 37682 | 86,98121 | 98,83123 | 1,16836  |
| Calving interval        | 0,000206   | 0,2524    | 0,000206 | 38413 | 88,66857 | 99,15222 | 0,84744  |
| Rear-leg set            | -0,00023   | 0,2524    | 0,000232 | 38524 | 88,9248  | 99,15689 | 0,84275  |
| Rear udder height       | 0,00018    | 0,2524    | 0,00018  | 39146 | 90,36056 | 99,35574 | 0,64396  |
| Front teat placement    | 0,000186   | 0,2524    | 0,000186 | 39284 | 90,6791  | 99,41652 | 0,58319  |
| Udder cleft depth       | -0,00015   | 0,2524    | 0,000148 | 40195 | 92,78196 | 99,64137 | 0,35841  |
| Udder balance           | 0,000117   | 0,2524    | 0,000117 | 40339 | 93,11435 | 99,68638 | 0,31341  |
| Hock quality            | -3,5E-05   | 0,2524    | 3,49E-05 | 42532 | 98,17645 | 99,97641 | 0,02353  |

**Supplementary Table S6.** Results of the association analysis between *GRAMD1B* SNP rs41757840 and 36 traits in cattle.

| Trait                   | SNP Effect | Base Freq | SNP W    | Rang  | Prang    | Sum Up   | Sum Down |
|-------------------------|------------|-----------|----------|-------|----------|----------|----------|
| Overall udder score     | -0,00473   | 0,6411    | 0,004727 | 982   | 2,26675  | 9,24628  | 90,74605 |
| Fore udder attachment   | -0,00411   | 0,6411    | 0,004109 | 1156  | 2,66839  | 10,6162  | 89,37639 |
| Overall feet/legs score | -0,0042    | 0,6411    | 0,004199 | 1593  | 3,67712  | 13,46867 | 86,52458 |
| Udder depth             | -0,00469   | 0,6411    | 0,004695 | 1732  | 3,99797  | 14,66067 | 85,33275 |
| Sum (points)            | -0,00361   | 0,6411    | 0,003612 | 1886  | 4,35345  | 15,50036 | 84,49315 |
| Rump length             | -0,00399   | 0,6411    | 0,003995 | 1928  | 4,45039  | 16,04848 | 83,94504 |
| Fore udder length       | -0,00402   | 0,6411    | 0,004024 | 2218  | 5,1198   | 17,65284 | 82,34095 |
| Overall frame           | -0,00305   | 0,6411    | 0,003046 | 4048  | 9,34398  | 28,66318 | 71,33169 |
| Milking speed           | -0,00273   | 0,6411    | 0,002735 | 6739  | 15,55561 | 40,69088 | 59,30496 |
| Rump height             | -0,00245   | 0,6411    | 0,002447 | 7728  | 17,83851 | 44,95219 | 55,04395 |
| Teat thickness          | 0,002067   | 0,6411    | 0,002067 | 9449  | 21,81109 | 51,38202 | 48,61449 |
| Calving interval        | 0,001954   | 0,6411    | 0,001954 | 10475 | 24,1794  | 54,74396 | 45,25274 |
| Chest width             | -0,00208   | 0,6411    | 0,002081 | 10550 | 24,35252 | 54,29817 | 45,69852 |
| Protein yield td        | -0,00196   | 0,6411    | 0,001962 | 11794 | 27,22404 | 58,5176  | 41,47931 |
| Milk yield td           | -0,00192   | 0,6411    | 0,001924 | 12381 | 28,57901 | 60,44028 | 39,55672 |
| Overall rump            | -0,00163   | 0,6411    | 0,001631 | 13294 | 30,68649 | 63,09113 | 36,90602 |
| Body depth              | -0,00174   | 0,6411    | 0,001741 | 14523 | 33,52338 | 66,6166  | 33,38075 |
| Foot angle              | -0,00178   | 0,6411    | 0,00178  | 14839 | 34,2528  | 67,28193 | 32,71547 |
| Front teat length       | 0,001827   | 0,6411    | 0,001827 | 14955 | 34,52057 | 67,84849 | 32,14894 |
| Udder balance           | -0,00142   | 0,6411    | 0,001424 | 15109 | 34,87604 | 68,08566 | 31,91177 |
| Udder cleft depth       | -0,00165   | 0,6411    | 0,001649 | 15731 | 36,3118  | 69,46926 | 30,52824 |
| Rump angle              | 0,001588   | 0,6411    | 0,001588 | 17481 | 40,35132 | 73,43787 | 26,55986 |
| Rear udder width        | 0,001371   | 0,6411    | 0,001371 | 18925 | 43,6845  | 76,63002 | 23,36788 |
| Front teat placement    | -0,00128   | 0,6411    | 0,001279 | 19298 | 44,5455  | 77,51528 | 22,4827  |
| Heel height             | -0,00136   | 0,6411    | 0,001361 | 19892 | 45,91662 | 78,64013 | 21,35788 |
| Fat yield td            | -0,00115   | 0,6411    | 0,001153 | 20995 | 48,46267 | 80,74599 | 19,25216 |
| Hock quality            | -0,00105   | 0,6411    | 0,001052 | 21615 | 49,89382 | 81,74564 | 18,25256 |
| Rear teat placement     | 0,000926   | 0,6411    | 0,000926 | 23630 | 54,54503 | 85,34924 | 14,64919 |
| Scs (log2n)             | 0,000943   | 0,6411    | 0,000943 | 26264 | 60,62509 | 88,93005 | 11,06861 |
| Rear udder height       | -0,00075   | 0,6411    | 0,000754 | 27052 | 62,44402 | 89,99812 | 10,0006  |
| Thurl placement         | 0,000625   | 0,6411    | 0,000625 | 28786 | 66,44661 | 92,19796 | 7,80093  |
| Rump width              | -0,00043   | 0,6411    | 0,000433 | 33417 | 77,13633 | 96,43794 | 3,56133  |
| Rear teat direction     | 0,000328   | 0,6411    | 0,000328 | 36441 | 84,11662 | 98,25774 | 1,74176  |
| Rear-leg set            | -0,00025   | 0,6411    | 0,000249 | 38171 | 88,10997 | 99,02709 | 0,97253  |
| Top line                | 3,21E-05   | 0,6411    | 3,21E-05 | 42608 | 98,35188 | 99,98049 | 0,01946  |
| Longevity               | -2,8E-05   | 0,6411    | 2,78E-05 | 42660 | 98,47191 | 99,9848  | 0,01515  |

**Supplementary Table S7.** Results of the association analysis between *GRAMD1C* SNP rs41616212 and 36 traits in cattle.

| Trait                   | SNP Effect | Base Freq | SNP W    | Rang  | Prang    | Sum Up   | Sum Down |
|-------------------------|------------|-----------|----------|-------|----------|----------|----------|
| Heel height             | 0,005595   | 0,6091    | 0,005595 | 695   | 1,60427  | 6,95771  | 93,03413 |
| Rump width              | 0,004754   | 0,6091    | 0,004754 | 784   | 1,8097   | 7,71795  | 92,27401 |
| Udder depth             | 0,005486   | 0,6091    | 0,005486 | 940   | 2,1698   | 9,05763  | 90,93467 |
| Sum (points)            | 0,004112   | 0,6091    | 0,004112 | 1145  | 2,643    | 10,37791 | 89,61471 |
| Top line                | -0,00412   | 0,6091    | 0,004124 | 1450  | 3,34703  | 12,43097 | 87,56212 |
| Rump height             | 0,004398   | 0,6091    | 0,004398 | 1503  | 3,46937  | 13,70097 | 86,29209 |
| Longevity               | 0,003792   | 0,6091    | 0,003792 | 2000  | 4,61659  | 16,34464 | 83,649   |
| Rear teat direction     | 0,004011   | 0,6091    | 0,004011 | 2280  | 5,26291  | 18,15226 | 81,84157 |
| Chest width             | 0,003708   | 0,6091    | 0,003708 | 2576  | 5,94617  | 19,6705  | 80,3236  |
| Rear udder height       | 0,00347    | 0,6091    | 0,00347  | 2650  | 6,11698  | 19,99245 | 80,00166 |
| Overall udder score     | 0,003436   | 0,6091    | 0,003436 | 3133  | 7,23189  | 23,06419 | 76,93023 |
| Foot angle              | 0,003291   | 0,6091    | 0,003291 | 4763  | 10,99441 | 31,68567 | 68,30952 |
| Overall frame           | 0,002705   | 0,6091    | 0,002705 | 5455  | 12,59175 | 35,46346 | 64,53198 |
| Rear teat placement     | 0,002542   | 0,6091    | 0,002542 | 6386  | 14,74078 | 39,36344 | 60,63227 |
| Thurl placement         | -0,00241   | 0,6091    | 0,002406 | 6555  | 15,13088 | 39,55071 | 60,44504 |
| Calving interval        | -0,00248   | 0,6091    | 0,002479 | 6728  | 15,53022 | 40,82598 | 59,16983 |
| Overall feet/legs score | 0,002381   | 0,6091    | 0,002381 | 8153  | 18,81954 | 45,72183 | 54,27434 |
| Fore udder attachment   | 0,002099   | 0,6091    | 0,002099 | 8328  | 19,22349 | 47,03459 | 52,96163 |
| Milking speed           | 0,002329   | 0,6091    | 0,002329 | 9346  | 21,57333 | 50,69987 | 49,29658 |
| Rump length             | 0,002062   | 0,6091    | 0,002062 | 10273 | 23,71312 | 53,65072 | 46,34594 |
| Rump angle              | -0,0023    | 0,6091    | 0,002301 | 10680 | 24,6526  | 54,72527 | 45,27144 |
| Hock quality            | -0,00188   | 0,6091    | 0,001884 | 10962 | 25,30354 | 55,7029  | 44,29389 |
| Overall rump            | 0,001504   | 0,6091    | 0,001504 | 14724 | 33,98735 | 67,0042  | 32,99317 |
| Udder cleft depth       | -0,00172   | 0,6091    | 0,001716 | 14988 | 34,59674 | 67,57623 | 32,42117 |
| Scs (log2n)             | -0,00174   | 0,6091    | 0,001741 | 15631 | 36,08098 | 68,97657 | 31,02094 |
| Protein yield td        | 0,001522   | 0,6092    | 0,001522 | 16379 | 37,80758 | 71,0121  | 28,9855  |
| Body depth              | 0,001536   | 0,6091    | 0,001536 | 16726 | 38,60856 | 72,10791 | 27,88975 |
| Front teat placement    | 0,001464   | 0,6091    | 0,001464 | 16865 | 38,92941 | 72,2579  | 27,73979 |
| Udder balance           | 0,00118    | 0,6091    | 0,00118  | 18413 | 42,50265 | 75,82119 | 24,17668 |
| Fat yield td            | -0,00119   | 0,6091    | 0,001189 | 20432 | 47,1631  | 79,69128 | 20,30682 |
| Rear udder width        | 0,001258   | 0,6091    | 0,001258 | 20462 | 47,23235 | 79,70948 | 20,2886  |
| Milk yield td           | 0,001063   | 0,6091    | 0,001063 | 22877 | 52,80689 | 84,17851 | 15,81983 |
| Teat thickness          | 0,000936   | 0,6091    | 0,000936 | 23367 | 53,93795 | 85,02839 | 14,97003 |
| Rear-leg set            | 0,000964   | 0,6091    | 0,000964 | 24775 | 57,18803 | 86,92212 | 13,07641 |
| Fore udder length       | 0,000468   | 0,6091    | 0,000468 | 33468 | 77,25405 | 96,47507 | 3,52421  |
| Front teat length       | 7,73E-05   | 0,6091    | 7,73E-05 | 41812 | 96,51447 | 99,91615 | 0,08374  |

**Supplementary Table S8.** Results of the association analysis between *GRAMD2A* SNP rs109872173 and 36 traits in cattle.

| Trait                   | Snp Effect | Base Freq | Snp W    | Rang  | Prang    | Sum Up   | Sum Down |
|-------------------------|------------|-----------|----------|-------|----------|----------|----------|
| Calving interval        | 0,004068   | 0,2468    | 0,004068 | 1587  | 3,66327  | 13,878   | 86,11513 |
| Thurl placement         | -0,00298   | 0,2468    | 0,002978 | 3839  | 8,86155  | 26,73915 | 73,25559 |
| Body depth              | -0,00308   | 0,2468    | 0,003079 | 5164  | 11,92004 | 33,77483 | 66,22048 |
| Longevity               | 0,002645   | 0,2468    | 0,002645 | 5876  | 13,56355 | 36,66471 | 63,33086 |
| Hock quality            | -0,00219   | 0,2468    | 0,002186 | 8380  | 19,34352 | 46,76992 | 53,22636 |
| Protein yield td        | -0,00229   | 0,2469    | 0,002285 | 9133  | 21,08167 | 49,62742 | 50,36898 |
| Fore udder length       | -0,0022    | 0,2468    | 0,002197 | 10084 | 23,27686 | 53,04201 | 46,9546  |
| Rump length             | -0,00205   | 0,2468    | 0,002045 | 10424 | 24,06168 | 54,15365 | 45,84303 |
| Rear udder width        | -0,00214   | 0,2468    | 0,00214  | 10776 | 24,8742  | 55,15326 | 44,84348 |
| Top line                | 0,001904   | 0,2468    | 0,001904 | 11178 | 25,80213 | 56,22273 | 43,77408 |
| Heel height             | 0,001727   | 0,2468    | 0,001727 | 15578 | 35,95864 | 68,95489 | 31,04259 |
| Fat yield td            | -0,00156   | 0,2468    | 0,001556 | 15621 | 36,05789 | 69,18412 | 30,8134  |
| Scs (log2n)             | 0,001663   | 0,2468    | 0,001663 | 16443 | 37,95531 | 70,94681 | 29,05082 |
| Udder depth             | 0,001662   | 0,2468    | 0,001662 | 16845 | 38,88325 | 72,09125 | 27,90642 |
| Milk yield td           | -0,00138   | 0,2468    | 0,001376 | 18402 | 42,47726 | 75,73241 | 24,26545 |
| Sum (points)            | -0,00112   | 0,2468    | 0,001121 | 19402 | 44,78556 | 77,80114 | 22,19684 |
| Overall feet/legs score | -0,00119   | 0,2468    | 0,001191 | 20508 | 47,33853 | 79,64257 | 20,35551 |
| Rear-leg set            | 0,000913   | 0,2468    | 0,000913 | 25579 | 59,0439  | 88,07483 | 11,92377 |
| Rump height             | -0,00081   | 0,2468    | 0,000806 | 26773 | 61,80001 | 89,79705 | 10,20167 |
| Fore udder attachment   | 0,000696   | 0,2468    | 0,000696 | 26895 | 62,08162 | 89,98238 | 10,01637 |
| Chest width             | -0,00079   | 0,2468    | 0,000792 | 27212 | 62,81335 | 90,22173 | 9,77701  |
| Teat thickness          | -0,0007    | 0,2468    | 0,000701 | 27798 | 64,16601 | 91,14249 | 8,85632  |
| Rump angle              | 0,000672   | 0,2468    | 0,000672 | 30651 | 70,75158 | 93,99549 | 6,00355  |
| Front teat length       | 0,000609   | 0,2468    | 0,000609 | 31676 | 73,11758 | 95,11958 | 4,87956  |
| Rear udder height       | -0,00044   | 0,2468    | 0,000438 | 33391 | 77,07631 | 96,37261 | 3,62665  |
| Foot angle              | 0,000429   | 0,2468    | 0,000429 | 34773 | 80,26638 | 97,36745 | 2,63192  |
| Front teat placement    | -0,0004    | 0,2468    | 0,000395 | 34842 | 80,42565 | 97,39315 | 2,60622  |
| Rear teat direction     | -0,00036   | 0,2468    | 0,000357 | 35835 | 82,71779 | 97,93789 | 2,06156  |
| Rump width              | 0,000285   | 0,2468    | 0,000285 | 36695 | 84,70292 | 98,41518 | 1,58434  |
| Rear teat placement     | -0,00024   | 0,2468    | 0,000239 | 37770 | 87,18434 | 98,86902 | 1,13058  |
| Overall frame           | -0,0002    | 0,2468    | 0,000195 | 38681 | 89,2872  | 99,25017 | 0,7495   |
| Overall rump            | -0,00016   | 0,2468    | 0,000159 | 39442 | 91,04381 | 99,45685 | 0,54287  |
| Udder cleft depth       | -0,00013   | 0,2468    | 0,00013  | 40591 | 93,69604 | 99,7247  | 0,2751   |
| Overall udder score     | 5,6E-05    | 0,2468    | 5,6E-05  | 42160 | 97,31776 | 99,94531 | 0,0546   |
| Milking speed           | -3,9E-05   | 0,2468    | 3,86E-05 | 42503 | 98,10951 | 99,97632 | 0,02363  |
| Udder balance           | 1,76E-06   | 0,2468    | 1,76E-06 | 43272 | 99,88459 | 99,99991 | 0,00009  |



**Supplementary Table S9.** Results of the association analysis between *GRAMD2B* SNP rs43504641 and 36 traits in cattle.

| Trait                   | SNP Effect | Base Freq | SNP W    | Rang  | Prang    | Sum Up   | Sum Down |
|-------------------------|------------|-----------|----------|-------|----------|----------|----------|
| Rump height             | -0,00444   | 0,2784    | 0,004441 | 1451  | 3,34934  | 13,33795 | 86,65504 |
| Front teat placement    | 0,0043     | 0,2784    | 0,0043   | 1598  | 3,68866  | 14,13251 | 85,86071 |
| Rump width              | -0,00368   | 0,2784    | 0,003676 | 2229  | 5,14519  | 17,77977 | 82,21402 |
| Rump angle              | -0,004     | 0,2784    | 0,003995 | 2926  | 6,75407  | 21,67199 | 78,3223  |
| Chest width             | -0,00356   | 0,2784    | 0,003565 | 2942  | 6,79101  | 21,78594 | 78,20838 |
| Calving interval        | 0,003415   | 0,2784    | 0,003415 | 2943  | 6,79332  | 22,38867 | 77,60557 |
| Milking speed           | -0,00369   | 0,2784    | 0,003692 | 3083  | 7,11648  | 23,12246 | 76,87191 |
| Rump length             | -0,00292   | 0,2784    | 0,002922 | 4959  | 11,44684 | 32,60745 | 67,38781 |
| Overall frame           | -0,00261   | 0,2784    | 0,002609 | 5940  | 13,71128 | 37,63238 | 62,36323 |
| Overall feet/legs score | 0,002511   | 0,2784    | 0,002511 | 7302  | 16,85518 | 42,38001 | 57,61596 |
| Udder cleft depth       | -0,00257   | 0,2784    | 0,002569 | 7764  | 17,92161 | 44,52149 | 55,47462 |
| Fore udder length       | 0,002008   | 0,2784    | 0,002008 | 11613 | 26,80624 | 57,99762 | 41,99928 |
| Sum (points)            | -0,00156   | 0,2784    | 0,001562 | 13451 | 31,04889 | 63,5949  | 36,4023  |
| Overall rump            | -0,0016    | 0,2784    | 0,001596 | 13657 | 31,5244  | 64,11452 | 35,88269 |
| Rear udder width        | 0,001762   | 0,2784    | 0,001762 | 14371 | 33,17252 | 65,80172 | 34,19559 |
| Body depth              | -0,00176   | 0,2784    | 0,001755 | 14382 | 33,19791 | 66,24134 | 33,75599 |
| Fore udder attachment   | 0,001423   | 0,2784    | 0,001423 | 15000 | 34,62444 | 67,86412 | 32,13331 |
| Thurl placement         | -0,00145   | 0,2784    | 0,001451 | 15168 | 35,01223 | 68,00449 | 31,99294 |
| Fat yield td            | 0,001522   | 0,2784    | 0,001522 | 16005 | 36,94428 | 70,12904 | 29,86852 |
| Rear teat placement     | 0,001394   | 0,2784    | 0,001394 | 16512 | 38,11458 | 71,55889 | 28,43876 |
| Protein yield td        | 0,001263   | 0,2784    | 0,001263 | 19661 | 45,38341 | 78,20493 | 21,79308 |
| Front teat length       | 0,001406   | 0,2784    | 0,001406 | 19707 | 45,48959 | 78,58365 | 21,41437 |
| Longevity               | 0,00109    | 0,2784    | 0,00109  | 21219 | 48,97973 | 81,18189 | 18,81628 |
| Top line                | -0,00105   | 0,2784    | 0,00105  | 22058 | 50,91639 | 82,43318 | 17,56506 |
| Rear udder height       | -0,00101   | 0,2784    | 0,001005 | 22539 | 52,02668 | 83,28534 | 16,71295 |
| Milk yield td           | 0,001075   | 0,2784    | 0,001075 | 22678 | 52,34754 | 83,84759 | 16,15074 |
| Udder depth             | -0,00119   | 0,2784    | 0,001188 | 22716 | 52,43525 | 83,77737 | 16,22096 |
| Hock quality            | 0,000831   | 0,2784    | 0,000831 | 25473 | 58,79922 | 87,92456 | 12,07402 |
| Rear teat direction     | 0,000723   | 0,2784    | 0,000723 | 28816 | 66,51586 | 92,14891 | 7,84998  |
| Heel height             | 0,000575   | 0,2784    | 0,000575 | 32059 | 74,00166 | 95,37894 | 4,62023  |
| Scs (log2n)             | 0,000499   | 0,2784    | 0,000499 | 33784 | 77,98347 | 96,61423 | 3,38506  |
| Teat thickness          | -0,00016   | 0,2784    | 0,000163 | 39463 | 91,09229 | 99,47388 | 0,52585  |
| Rear-leg set            | 0,000175   | 0,2784    | 0,000175 | 39698 | 91,63474 | 99,52119 | 0,47854  |
| Udder balance           | 0,000113   | 0,2784    | 0,000113 | 40436 | 93,33826 | 99,70647 | 0,29332  |
| Overall udder score     | -4,8E-05   | 0,2784    | 4,81E-05 | 42360 | 97,77942 | 99,96216 | 0,03776  |
| Foot angle              | -3,6E-05   | 0,2784    | 3,57E-05 | 42518 | 98,14413 | 99,97839 | 0,02156  |

**Supplementary Table S10.** Results of the association analysis between *GRAMD2B* SNP rs110898337 and 36 traits in cattle.

| Trait                   | SNP Effect | Base Freq | SNP W    | Rang  | Prang    | Sum Up   | Sum Down |
|-------------------------|------------|-----------|----------|-------|----------|----------|----------|
| Thurl placement         | 0,004059   | 0,8508    | 0,004059 | 1280  | 2,95462  | 11,24702 | 88,74581 |
| Overall rump            | 0,003077   | 0,8508    | 0,003077 | 3648  | 8,42066  | 25,83136 | 74,16326 |
| Milking speed           | -0,00327   | 0,8508    | 0,003269 | 4396  | 10,14727 | 30,05163 | 69,94339 |
| Udder depth             | 0,002916   | 0,8508    | 0,002916 | 7034  | 16,23655 | 41,61432 | 58,38159 |
| Top line                | 0,002415   | 0,8508    | 0,002415 | 7183  | 16,58049 | 41,89628 | 58,09967 |
| Rear-leg set            | -0,00249   | 0,8508    | 0,002488 | 8161  | 18,838   | 45,86568 | 54,13052 |
| Fore udder length       | -0,00225   | 0,8508    | 0,002245 | 9733  | 22,46665 | 51,83846 | 48,15807 |
| Overall frame           | 0,001864   | 0,8508    | 0,001864 | 11321 | 26,13222 | 57,617   | 42,37986 |
| Rear udder height       | 0,00174    | 0,8508    | 0,00174  | 12541 | 28,94834 | 60,49012 | 39,50693 |
| Rump length             | 0,001673   | 0,8508    | 0,001673 | 14036 | 32,39924 | 64,99677 | 35,00052 |
| Rump height             | 0,001574   | 0,8508    | 0,001574 | 15516 | 35,81552 | 69,10508 | 30,89244 |
| Front teat length       | 0,001553   | 0,8508    | 0,001553 | 17953 | 41,44084 | 74,94691 | 25,05091 |
| Fore udder attachment   | 0,001204   | 0,8508    | 0,001204 | 17994 | 41,53548 | 74,94868 | 25,04915 |
| Scs (log2n)             | 0,001526   | 0,8508    | 0,001526 | 18041 | 41,64397 | 74,57743 | 25,42039 |
| Teat thickness          | 0,001238   | 0,8508    | 0,001238 | 18568 | 42,86044 | 76,26092 | 23,73699 |
| Rear teat direction     | -0,00129   | 0,8508    | 0,00129  | 19739 | 45,56346 | 78,27283 | 21,72519 |
| Rear teat placement     | 0,001043   | 0,8508    | 0,001043 | 21663 | 50,00462 | 82,08372 | 17,91452 |
| Udder cleft depth       | -0,00096   | 0,8508    | 0,000956 | 24941 | 57,57121 | 87,34595 | 12,6526  |
| Front teat placement    | 0,000871   | 0,8508    | 0,000871 | 25741 | 59,41785 | 88,37205 | 11,62658 |
| Fat yield td            | -0,00084   | 0,8508    | 0,000837 | 26199 | 60,47505 | 88,99072 | 11,00794 |
| Rump angle              | 0,000915   | 0,8508    | 0,000915 | 26543 | 61,2691  | 89,34584 | 10,65286 |
| Udder balance           | 0,00059    | 0,8508    | 0,00059  | 29197 | 67,39532 | 92,72554 | 7,2734   |
| Longevity               | 0,00063    | 0,8508    | 0,00063  | 29391 | 67,84313 | 92,84785 | 7,1511   |
| Foot angle              | 0,000708   | 0,8508    | 0,000708 | 29646 | 68,43174 | 93,14682 | 6,85215  |
| Calving interval        | 0,000561   | 0,8508    | 0,000561 | 30555 | 70,52998 | 94,11286 | 5,88619  |
| Overall feet/legs score | 0,000484   | 0,8508    | 0,000484 | 33010 | 76,19685 | 96,06318 | 3,93604  |
| Rump width              | -0,00042   | 0,8508    | 0,000416 | 33774 | 77,96039 | 96,694   | 3,3053   |
| Overall udder score     | -0,00043   | 0,8508    | 0,000427 | 34019 | 78,52592 | 96,78894 | 3,21037  |
| Rear udder width        | -0,00045   | 0,8508    | 0,000445 | 34026 | 78,54208 | 96,86524 | 3,13408  |
| Protein yield td        | -0,0002    | 0,8508    | 0,000197 | 39094 | 90,24052 | 99,35923 | 0,64046  |
| Body depth              | 0,00012    | 0,8508    | 0,00012  | 40842 | 94,27543 | 99,77702 | 0,2228   |
| Chest width             | -8,6E-05   | 0,8508    | 8,57E-05 | 41416 | 95,60039 | 99,86994 | 0,12992  |
| Heel height             | 8,17E-05   | 0,8508    | 8,17E-05 | 41644 | 96,12668 | 99,89835 | 0,10153  |
| Hock quality            | -6,8E-05   | 0,8508    | 6,83E-05 | 41744 | 96,35751 | 99,90817 | 0,09171  |
| Milk yield td           | -5,1E-05   | 0,8508    | 5,13E-05 | 42197 | 97,40317 | 99,95464 | 0,04528  |
| Sum (points)            | 8,36E-06   | 0,8508    | 8,36E-06 | 43103 | 99,49448 | 99,99824 | 0,00174  |

**Supplementary Table S11.** Results of the association analysis between *GRAMD4* SNP rs109247065 and 36 traits in cattle.

| Trait                   | SNP Effect | Base Freq | SNP W    | Rang  | Prang    | Sum Up   | Sum Down |
|-------------------------|------------|-----------|----------|-------|----------|----------|----------|
| Top line                | -0,006     | 0,2415    | 0,006004 | 219   | 0,50552  | 2,58355  | 97,4064  |
| Fat yield td            | -0,00456   | 0,2415    | 0,004563 | 1177  | 2,71686  | 10,85216 | 89,14055 |
| Chest width             | 0,004185   | 0,2415    | 0,004185 | 1661  | 3,83408  | 13,9462  | 86,04714 |
| Hock quality            | -0,00368   | 0,2415    | 0,003676 | 2088  | 4,81972  | 16,98123 | 83,01251 |
| Milk yield td           | -0,00326   | 0,2415    | 0,003259 | 4164  | 9,61174  | 28,55191 | 71,44302 |
| Overall feet/legs score | -0,00307   | 0,2415    | 0,003073 | 4420  | 10,20267 | 29,53943 | 70,45563 |
| Teat thickness          | -0,00276   | 0,2415    | 0,002761 | 5108  | 11,79078 | 33,90669 | 66,08865 |
| Front teat length       | -0,00329   | 0,2415    | 0,003293 | 5311  | 12,25936 | 34,63167 | 65,36371 |
| Thurl placement         | 0,002633   | 0,2415    | 0,002633 | 5338  | 12,32168 | 34,14145 | 65,8539  |
| Rump length             | 0,00271    | 0,2415    | 0,00271  | 5930  | 13,6882  | 37,03202 | 62,96358 |
| Fore udder attachment   | 0,002397   | 0,2415    | 0,002397 | 6405  | 14,78464 | 39,26954 | 60,72614 |
| Milking speed           | -0,00251   | 0,2415    | 0,002508 | 8106  | 18,71105 | 46,13798 | 53,8582  |
| Rump height             | 0,002286   | 0,2415    | 0,002286 | 8798  | 20,30839 | 48,94498 | 51,05141 |
| Rear-leg set            | 0,002352   | 0,2415    | 0,002352 | 9047  | 20,88315 | 49,14348 | 50,85293 |
| Longevity               | -0,00206   | 0,2415    | 0,002064 | 9777  | 22,56821 | 51,92475 | 48,07179 |
| Rump width              | 0,002037   | 0,2415    | 0,002037 | 9798  | 22,61668 | 52,17862 | 47,81794 |
| Udder depth             | 0,00239    | 0,2415    | 0,00239  | 10365 | 23,92549 | 53,93328 | 46,06337 |
| Protein yield td        | -0,00195   | 0,2415    | 0,001951 | 11894 | 27,45487 | 58,82581 | 41,17112 |
| Rear udder height       | -0,00169   | 0,2415    | 0,001688 | 13043 | 30,1071  | 61,94929 | 38,04785 |
| Foot angle              | -0,00162   | 0,2415    | 0,001623 | 16544 | 38,18845 | 71,51955 | 28,47808 |
| Rear udder width        | -0,00134   | 0,2415    | 0,001339 | 19349 | 44,66322 | 77,50616 | 22,4918  |
| Overall frame           | 0,001168   | 0,2415    | 0,001168 | 19664 | 45,39033 | 78,53185 | 21,46618 |
| Sum (points)            | -0,00106   | 0,2415    | 0,001063 | 20387 | 47,05923 | 79,73408 | 20,26401 |
| Body depth              | 0,001142   | 0,2415    | 0,001142 | 21892 | 50,53322 | 82,58648 | 17,41179 |
| Rear teat direction     | 0,001112   | 0,2415    | 0,001112 | 22353 | 51,59734 | 83,09784 | 16,90045 |
| Udder cleft depth       | -0,00091   | 0,2415    | 0,000908 | 25703 | 59,33013 | 88,42139 | 11,57724 |
| Overall rump            | 0,000761   | 0,2415    | 0,000761 | 26152 | 60,36656 | 89,01194 | 10,98673 |
| Scs (log2n)             | -0,00093   | 0,2415    | 0,000927 | 26536 | 61,25294 | 89,29266 | 10,70601 |
| Calving interval        | -0,00045   | 0,2415    | 0,000454 | 32780 | 75,66594 | 96,02067 | 3,97857  |
| Rear teat placement     | -0,00036   | 0,2415    | 0,000365 | 34880 | 80,51337 | 97,40401 | 2,59538  |
| Front teat placement    | -0,00036   | 0,2415    | 0,000362 | 35486 | 81,91219 | 97,77801 | 2,22142  |
| Udder balance           | 0,000177   | 0,2415    | 0,000177 | 38879 | 89,74424 | 99,29962 | 0,70006  |
| Rump angle              | -0,00014   | 0,2415    | 0,000141 | 40587 | 93,68681 | 99,72645 | 0,27335  |
| Fore udder length       | 5,09E-05   | 0,2415    | 5,09E-05 | 42203 | 97,41702 | 99,95645 | 0,04347  |
| Heel height             | -3,7E-05   | 0,2415    | 3,74E-05 | 42571 | 98,26647 | 99,9785  | 0,02145  |
| Overall udder score     | 2,1E-05    | 0,2415    | 2,1E-05  | 42912 | 99,0536  | 99,99305 | 0,00692  |

**Supplementary Table S12.** Results of the association analysis between *GRAMD4* SNP rs109726105 and 36 traits in cattle.

| Trait                   | SNP Effect | Base Freq | SNP W    | Rang  | Prang    | Sum Up   | Sum Down |
|-------------------------|------------|-----------|----------|-------|----------|----------|----------|
| Scs (log2n)             | -0,006     | 0,3806    | 0,005998 | 617   | 1,42422  | 6,42073  | 93,57072 |
| Rump length             | 0,005082   | 0,3806    | 0,005082 | 732   | 1,68967  | 7,4131   | 92,57866 |
| Rear teat direction     | -0,00524   | 0,3806    | 0,005245 | 781   | 1,80278  | 7,72927  | 92,26266 |
| Rear udder width        | 0,004796   | 0,3806    | 0,004796 | 1175  | 2,71225  | 10,81256 | 89,18012 |
| Rear teat placement     | -0,00422   | 0,3806    | 0,004223 | 1389  | 3,20622  | 12,5021  | 87,49078 |
| Milk yield td           | 0,004326   | 0,3806    | 0,004326 | 1639  | 3,7833   | 13,95545 | 86,03782 |
| Milking speed           | 0,004029   | 0,3806    | 0,004029 | 2309  | 5,32986  | 18,58294 | 81,41092 |
| Body depth              | 0,00405    | 0,3806    | 0,00405  | 2350  | 5,4245   | 18,76158 | 81,23226 |
| Udder cleft depth       | -0,00359   | 0,3806    | 0,003588 | 3384  | 7,81127  | 24,56727 | 75,4273  |
| Rump height             | 0,003281   | 0,3806    | 0,003281 | 3889  | 8,97696  | 27,83442 | 72,1604  |
| Teat thickness          | 0,003002   | 0,3806    | 0,003002 | 4090  | 9,44093  | 28,95911 | 71,03582 |
| Fat yield td            | 0,003135   | 0,3806    | 0,003135 | 4292  | 9,90721  | 29,30906 | 70,68593 |
| Udder depth             | -0,00356   | 0,3806    | 0,003555 | 4356  | 10,05494 | 29,53162 | 70,4634  |
| Hock quality            | 0,00287    | 0,3806    | 0,00287  | 4513  | 10,41734 | 30,3221  | 69,67301 |
| Overall frame           | 0,002909   | 0,3806    | 0,002909 | 4573  | 10,55584 | 31,29616 | 68,69894 |
| Foot angle              | -0,00329   | 0,3806    | 0,003289 | 4768  | 11,00596 | 31,70972 | 68,28547 |
| Calving interval        | -0,00286   | 0,3806    | 0,002863 | 4805  | 11,09136 | 32,19292 | 67,80224 |
| Protein yield td        | 0,002762   | 0,3806    | 0,002762 | 6203  | 14,31836 | 38,03942 | 61,95623 |
| Top line                | 0,002539   | 0,3806    | 0,002539 | 6470  | 14,93468 | 38,93771 | 61,05804 |
| Front teat placement    | -0,00253   | 0,3806    | 0,002528 | 7334  | 16,92904 | 43,19536 | 56,80065 |
| Longevity               | -0,00228   | 0,3806    | 0,002281 | 8118  | 18,73875 | 45,89553 | 54,10065 |
| Heel height             | -0,00219   | 0,3806    | 0,002191 | 11130 | 25,69133 | 56,30323 | 43,69357 |
| Fore udder length       | 0,002064   | 0,3806    | 0,002064 | 11143 | 25,72134 | 56,51954 | 43,47727 |
| Thurl placement         | -0,00147   | 0,3806    | 0,001473 | 14897 | 34,38669 | 67,30426 | 32,69314 |
| Front teat length       | 0,001769   | 0,3806    | 0,001769 | 15555 | 35,90554 | 69,36226 | 30,63526 |
| Chest width             | 0,001365   | 0,3806    | 0,001365 | 18245 | 42,11486 | 75,03747 | 24,96036 |
| Fore udder attachment   | 0,001039   | 0,3806    | 0,001039 | 20573 | 47,48857 | 80,159   | 19,83913 |
| Udder balance           | -0,00098   | 0,3806    | 0,000976 | 21786 | 50,28854 | 82,36778 | 17,63046 |
| Overall udder score     | -0,00106   | 0,3806    | 0,00106  | 22231 | 51,31573 | 82,84649 | 17,15179 |
| Rump width              | 0,000964   | 0,3806    | 0,000964 | 23161 | 53,46244 | 84,50476 | 15,49361 |
| Rear udder height       | 0,000907   | 0,3806    | 0,000907 | 24247 | 55,96925 | 86,05008 | 13,94838 |
| Sum (points)            | 0,000827   | 0,3806    | 0,000827 | 24463 | 56,46785 | 86,64415 | 13,35436 |
| Overall rump            | 0,000538   | 0,3806    | 0,000538 | 30724 | 70,92009 | 94,19113 | 5,80792  |
| Rear-leg set            | 0,000508   | 0,3806    | 0,000508 | 32918 | 75,98449 | 96,01377 | 3,98546  |
| Rump angle              | -0,00024   | 0,3806    | 0,000244 | 38575 | 89,04252 | 99,17252 | 0,82713  |
| Overall feet/legs score | -0,00021   | 0,3806    | 0,000214 | 38614 | 89,13254 | 99,17099 | 0,82866  |

**Supplementary Table S13.** QTLs overlapping the *GRAMD1B* gene in QTLdb.

| Data Type   | Abbreviation | QTL ID | Trait Name                               | Chromosome              | Breed                                                                                     | SNPs                                 | Trait Class>>Type>>Trait Ontology                                                                                                     |
|-------------|--------------|--------|------------------------------------------|-------------------------|-------------------------------------------------------------------------------------------|--------------------------------------|---------------------------------------------------------------------------------------------------------------------------------------|
| QTL         | SEMVOL       | 9924   | Semen volume                             | 15:10848754-34870995 bp | Holstein                                                                                  |                                      | Reproduction>>semen quality>>Semen volume CMO:semen volume"                                                                           |
| QTL         | HEIGHT       | 10993  | Body height"                             | 15:29415621-42069918 bp | Angus                                                                                     |                                      | Production>>Growth>>Body height VT:body height CMO:body height"                                                                       |
| QTL         | SIGG         | 66191  | Immunoglobulin G level                   | 15:24184972-37358459 bp | Charolais, Holstein                                                                       |                                      | Health>>Immune capacity>>Immunoglobulin G level VT:blood immunoglobulin G amount CMO:blood immunoglobulin G level"                    |
| QTL         | FA-C13:0     | 19626  | Tridecylic acid content                  | 15:20-59060134 bp       | Angus                                                                                     | rs41662110; rs81159416; rs81159430   | Meat and Carcass>>Fatty acid content>>Tridecylic acid content PT:meat fatty acid C13:0 content"                                       |
| QTL         | RANG         | 1699   | Rump angle                               | 15:12367579-42062169 bp |                                                                                           |                                      | Exterior>>conformation>>Rump angle VT:rump angle"                                                                                     |
| QTL         | MFI          | 4836   | Myofibrillar fragmentation index         | 15:24184972-37358459 bp |                                                                                           |                                      | Meat and Carcass>>Sensory characteristics>>Myofibrillar fragmentation index PT:meat tenderness"                                       |
| QTL         | PP           | 21547  | Milk protein percentage                  | 15:27896796-47037097 bp | Holstein                                                                                  |                                      | Milk>>Milk composition - protein>>Milk protein percentage VT:milk protein amount PT:milk protein content CMO:milk protein percentage" |
| QTL         | KPHCW T      | 1335   | Kidney, pelvic, and heart fat percentage | 15:16273131-53468859 bp |                                                                                           |                                      | Meat and Carcass>>Fatness>>Kidney, pelvic, and heart fat percentage VT:internal adipose amount"                                       |
| Association | MFA-C13:0    | 155975 | Milk tridecylic acid content             | 15:34161889-34161893 bp | Holstein                                                                                  | rs385648690                          | Milk>>Milk composition - fat>>Milk tridecylic acid content PT:milk fatty acid C13:0 content"                                          |
| Association | BWG          | 68783  | Body weight gain                         | 15:34205210-34205214 bp | Charolais, Gelbvieh, Hereford, Limousin, Pinzgauer, Red angus, Red poll, Simmental, Angus | rs41756499                           | Production>>Growth>>Body weight gain VT:postnatal growth trait CMO:body weight gain"                                                  |
| QTL         | SCS          | 3416   | Somatic cell score                       | 15:27121885-37358459 bp |                                                                                           |                                      | Health>>Mastitis>>Somatic cell score VT:milk somatic cell quantity PT:milk somatic cell count CMO:milk somatic cell score"            |
| QTL         | HDPH         | 3431   | Heel depth                               | 15:13948398-37358459 bp |                                                                                           |                                      | Exterior>>Limb traits>>Heel depth VT:heel depth"                                                                                      |
| QTL         | FERIND       | 62361  | Fertility index                          | 15:34139603-34139607 bp | Ayrshire, Danish red, Swedish Red-and-White                                               | rs385244975; rs41763261; rs110960719 | Reproduction>>Fertility>>Fertility index VT:female fertility trait"                                                                   |
| Association | FERIND       | 62407  | Fertility index                          | 15:34139603-34139607 bp | Ayrshire, Danish red, Swedish Red-and-White                                               | rs41763261                           | Reproduction>>Fertility>>Fertility index VT:female fertility trait"                                                                   |
| Association | INSINT       | 62411  | Interval from first to last insemination | 15:34139603-34139607 bp | Ayrshire, Danish red, Swedish Red-and-White                                               | rs41763261                           | Reproduction>>Fertility>>Interval from first to last insemination VT:female fertility trait"                                          |
| Association | CALEST       | 62410  | Interval to first estrus after calving   | 15:34164294-34164298 bp | Ayrshire, Danish red, Swedish Red-and-White                                               | rs41763326                           | Reproduction>>Fertility>>Interval to first estrus after calving VT:female fertility trait"                                            |

|             |         |       |                              |                             |                                             |             |                                                                                         |
|-------------|---------|-------|------------------------------|-----------------------------|---------------------------------------------|-------------|-----------------------------------------------------------------------------------------|
| Association | CONCEPT | 62408 | Inseminations per conception | 15:34199597-34199601 bp     | Ayrshire, Danish red, Swedish Red-and-White | rs110670590 | Reproduction>>Fertility>>Inseminations per conception VT:fertility trait"               |
| QTL         | SB      | 5039  | Stillbirth                   | 15:34072836-34227818 bp     | Ayrshire                                    |             | Reproduction>>Fertility>>Stillbirth VT:stillborn offspring quantity"                    |
| QTL         | LMA     | 10995 | Longissimus muscle area      | 15:29415621-42069918 bp     | Angus                                       |             | Meat and Carcass>>Anatomy>>Longissimus muscle area VT:longissimus thoracis muscle area" |
| QTL         | CWT     | 10994 | Carcass weight               | 15:29415621-42069918 bp     | Angus                                       |             | Meat and Carcass>>Anatomy>>Carcass weight PT:dressed carcass weight CMO:carcass weight" |
| QTL         | LIVP    | 12195 | Liver percentage             | Chr.15:30275772-57056696 bp | Jersey, Limousin                            |             | Liver percentage VT:liver mass CMO:liver weight to body weight ratio"                   |

Legend: QTL: Quantitative trait locus

**Supplementary Table S14.** Gene ontology terms for six *GRAMD* genes in five vertebrate species: cattle (C), human (H), mouse (M), pig (P), chicken (Ch).

| GO term    | GO term name                                                                              | <i>GRAMD1A</i> | <i>GRAMD1B</i> | <i>GRAMD1C</i> | <i>GRAMD2A</i> | <i>GRAMD2B</i> | <i>GRAMD4</i>  |
|------------|-------------------------------------------------------------------------------------------|----------------|----------------|----------------|----------------|----------------|----------------|
|            | <b>Biological process</b>                                                                 |                |                |                |                |                |                |
| GO:0006869 | lipid transport                                                                           | C, H, M, P     | C, H, M, P     | H, M, P, Ch    |                |                |                |
| GO:0006914 | autophagy                                                                                 | H, M           |                |                |                |                |                |
| GO:0006915 | apoptotic process                                                                         |                |                |                |                |                | C, H, M, P, Ch |
| GO:0015918 | sterol transport                                                                          |                | C, H           | C, P           |                |                |                |
| GO:0032366 | intracellular sterol transport                                                            | C, H, M, P     | C, H, M, P     | H, M           |                |                |                |
| GO:0034164 | negative regulation of toll-like receptor 9 signaling pathway                             |                |                |                |                |                | C, H, M, P, Ch |
| GO:0042632 | cholesterol homeostasis                                                                   |                | C, H, M, P     |                |                |                |                |
| GO:0043280 | positive regulation of cysteine-type endopeptidase activity involved in apoptotic process |                |                |                |                |                | H              |
| GO:0061817 | endoplasmic reticulum-plasma membrane tethering                                           |                |                |                | C, H, M, Ch    |                |                |
| GO:0071397 | cellular response to cholesterol                                                          | C, H, M        | C, H, M, P     | C, H, M, P, Ch |                |                |                |
| GO:0120009 | intermembrane lipid transfer                                                              | C, H, M, P     | C, H, M, P     | C, H, M, P     |                |                |                |
| GO:2001256 | regulation of store-operated calcium entry                                                |                |                |                | C, H, M, Ch    |                |                |
|            | <b>Cellular component</b>                                                                 |                |                |                |                |                |                |
| GO:0005739 | mitochondrion                                                                             |                |                |                |                |                | C, H, M, P, Ch |
| GO:0005776 | autophagosome                                                                             | H, M           |                |                |                |                |                |
| GO:0005783 | endoplasmic reticulum                                                                     | H, M           | C, H, M, P     | H, M           | H, M           |                | H, M           |
| GO:0005789 | endoplasmic reticulum membrane                                                            | C, H, M, P     | C, H, M, P     | C, H, M, P, Ch | C, H, M, Ch    |                | H, M           |
| GO:0005829 | cytosol                                                                                   | CHMP           |                |                |                |                |                |
| GO:0005881 | cytoplasmic microtubule                                                                   |                |                |                |                | C, H, M, P, Ch |                |
| GO:0005886 | plasma membrane                                                                           | C, H, M, P     | C, H, M, P     | C, H, M, P, Ch | C, H, M, Ch    |                |                |
| GO:0016020 | membrane                                                                                  | C, H, M, P     | C, H, M, P     | C, H, M, P, Ch | C, H, M        | C, P           | C, H, M, P     |
| GO:0031234 | extrinsic component of cytoplasmic side of plasma membrane                                |                |                |                | C, H, M        |                |                |
| GO:0031410 | cytoplasmic vesicle                                                                       | H, M           |                |                |                |                |                |
| GO:0031966 | mitochondrial membrane                                                                    |                |                |                |                |                | H, M           |
| GO:0043231 | intracellular membrane-bounded organelle                                                  |                | C, H, M, P     |                |                |                |                |
| GO:0044232 | organelle membrane contact site                                                           | C, H, M, P     | C, H, M, P     | H, M, P, Ch    | C, H, M, Ch    |                |                |
| GO:0140268 | endoplasmic reticulum-plasma membrane contact site                                        | C, H, M, P     | C, H, M, P     | C, H, M, P, Ch |                |                |                |
|            | <b>Molecular function</b>                                                                 |                |                |                |                |                |                |
| GO:0001786 | phosphatidylserine binding                                                                |                | C, H, M, P     |                |                |                |                |
| GO:0003674 | molecular function                                                                        |                |                |                |                | M              | H              |
| GO:0005515 | protein binding                                                                           | H              |                | H              | H              | H              | H, M           |
| GO:0005546 | phosphatidylinositol-4,5-bisphosphate binding                                             |                |                |                | C, H, M, Ch    |                |                |
| GO:0008289 | lipid binding                                                                             | H, M           | H, M           | H, M           | H, M           |                |                |
| GO:0015485 | cholesterol binding                                                                       | C, H, M, P     | C, H, M, P     | C, H, M, P, Ch |                |                |                |
| GO:0035091 | phosphatidylinositol binding                                                              |                |                |                | C, H, M, Ch    |                |                |
| GO:0042802 | identical protein binding                                                                 |                |                |                |                | C, H, M, P, Ch |                |

|            |                               |            |            |                |  |  |  |
|------------|-------------------------------|------------|------------|----------------|--|--|--|
| GO:0070300 | phosphatidic acid binding     |            | C, H, M, P |                |  |  |  |
| GO:0120020 | cholesterol transfer activity | C, H, M, P | C, H, M, P | C, H, M, P, Ch |  |  |  |

**Supplementary Figure S1.** Synteny between human chromosome 22 with *GRAMD4* gene and chromosomes in cattle, pig, mouse and chicken. Legend: Syntenic blocks are shown in different colors (pink, green, purple, turquoise, orange, and yellow), red line denotes the location of the *GRAMD4* gene.

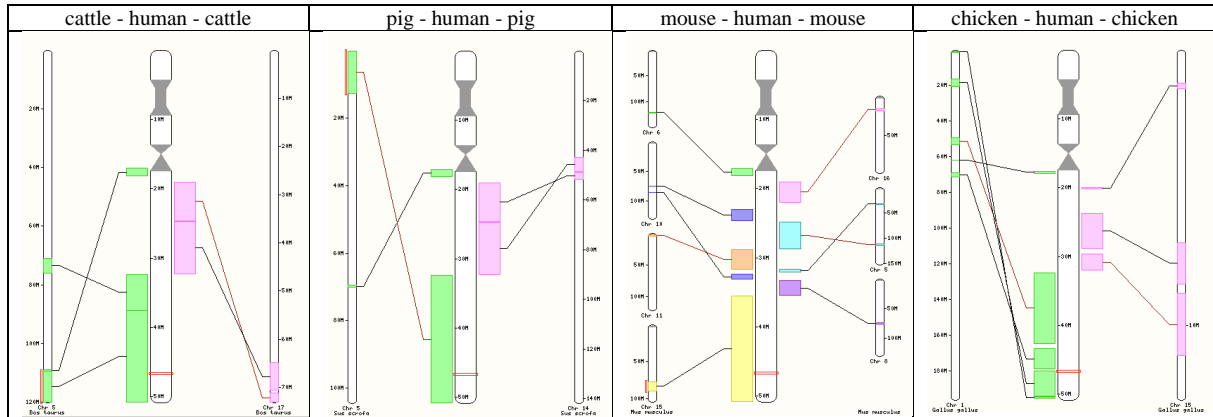

**Supplementary Figure S2.** Nucleotide sequence of the transcript ENSBTAT00000074465.2 (*GRAMD1B-205*). (from 5' UTR to intron 2). rs109709275 is in intron 1 (orange color).

|                    |        |                                                                                                                                                                                                                                                                                                                                                                                                                                                                                                                                                                                    |
|--------------------|--------|------------------------------------------------------------------------------------------------------------------------------------------------------------------------------------------------------------------------------------------------------------------------------------------------------------------------------------------------------------------------------------------------------------------------------------------------------------------------------------------------------------------------------------------------------------------------------------|
|                    |        | gcccgggtgctctgatccctctccccgggctgcctgactgccacagcctatccccggtgccccgggtgaaatgggccagagaggaagcggtagtgcactgcgagcagagcggcctgtccctgtggcaggaaacctagagtgatgaatgggcccggatgaagtcacctgtctctccaatcaggctgtccagagagatccaggggctctgcagatccagcgggtgcgggtgct                                                                                                                                                                                                                                                                                                                                            |
| ENSBTAE00000607223 | 109    | CTCATGTACCTTTAGACAGGCTGTGAGTCTCTGGGAGTGGAGTGGGGGGTGCAGCCGCCGCCCCGCTCCTGTGTAGCCCTCAGTCAGTCTGAATGTATTGCAAG                                                                                                                                                                                                                                                                                                                                                                                                                                                                           |
| Intron 1-2         | 586    | gtgagtggtctaccgggctattcctctccctctgcattctcggccttgctgcccggcctgtggtctctggcactccttgacagcacttctgcttccatctgaggcctgccccttcttctgagcttctcacaccgcacccaccgcccctcagccttctccctcttgctacccccggaactgtcagcaccggccagctggcctctcccacgagctcccctgcctgacctgtgggtaccaattggcccgggtgatgggagggcagggccttcatctctgtgagctctccccagcagggggagccctggcgagaCctgcaacttaactcctgggaagaagggcccttgactcagcccgaagtgggctctgtgggaaacacgggcaggccccgcacatgcccgggggacccaaggtctttgtctcccacccdcagccgagggaggtcccgggccaagcttggaaacaggtctctcattcccagccttcagaggggtgctgttcttctgtgggtggactttgtgactctgctttctctcttcttcttggagggcgcgctgccccttag |
| ENSBTAE00000625991 | 76     | GCCAAGCCGCAATCATGGAGCCGGCTGATATGGCGACAGCAAAGGTAGGATGGAAATGCTGCCGGCCGCACTGTGC                                                                                                                                                                                                                                                                                                                                                                                                                                                                                                       |
| Intron 2-3         | 66,969 | gtaagtggcttgccttggcgagttctacctcgttcacttctctcctcctctgtcccacagcccctccctccgggagagtaccagggaccgtgtcagagtggaggggaaatggcagaagtgagcctcggaggggaggaaggccggcctccagtgcactgcctcactctgtgtgctggaagcctggggggggggcggtgactgtactgtgattggctgacctgtgtgtgcatgtcttctcttagctttgcctcggtttccttgaccttatacctgtgtcttttctcacccttctcccttattctctctgctcctcccgcactgcagtgctgtct                                                                                                                                                                                                                                       |



**Supplementary Figure S3.** Multispecies alignment of the nucleotide sequence flanking the SNP rs109709275 (genomic location 15:34109932- 34109992).

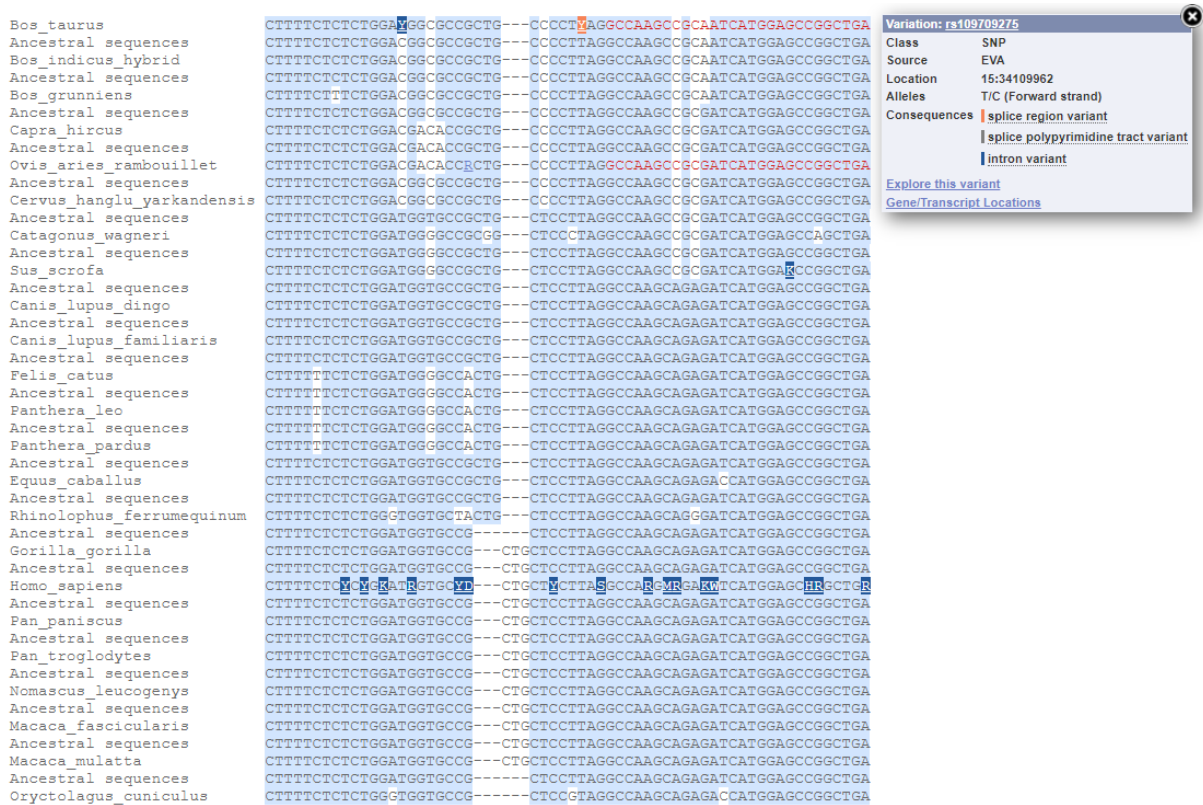

**Supplementary Figure S4.** Location of the *GRAMD1B* SNP rs109709275 within constrained element with the score 576.40 and extending 164 bp.

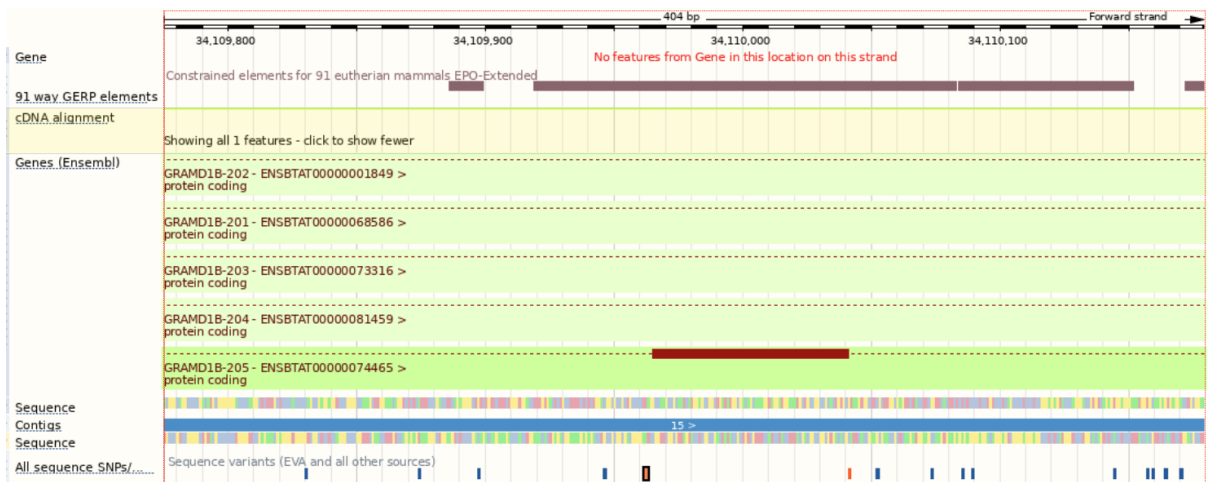

Supplement: 41598_2024_80117_MOESM1_ESM.pdf [file 41598_2024_80117_MOESM1_ESM.pdf]
